# Supplementary material for: Predicting the Risk of Glacial Lake Outburst Floods in Karakorum
Source: Copernicus journal article supplement (doi:10.5194/egusphere-2024-565), 2024-03-21
Supplement: Supplementary file 1 [file egusphere-2024-565-supplement.pdf]

# Supplementary Material

## Predicting the Risk of Glacial Lake Outburst Floods in Karakorum

5

Nazir Ahmed Bazai <sup>1,2</sup>, Paul A. Carling <sup>3\*</sup>, Peng Cui <sup>2,4\*</sup>, Hao Wang <sup>2,4</sup>, Zhang Guotao <sup>4</sup>, Liu Dingzhu <sup>4,5,6</sup>, Javed Hassan <sup>7</sup>

<sup>1</sup> Key Laboratory of Mountain Hazards and Earth Surface Process/Institute of Mountain Hazards and Environment, Chinese Academy of Sciences (CAS), Chengdu, China

10 <sup>2</sup> China-Pakistan Joint Research Center on Earth Sciences, Chinese Academy of Sciences and HEC, Islamabad, Pakistan.

<sup>3</sup> Geography and Environmental Science, University of Southampton, Southampton SO17 1BJ, UK

<sup>4</sup> Institute of Geographic Sciences and Natural Resources Research, Chinese Academy of Sciences, Beijing, China

<sup>5</sup> Earth Surface Process Modelling, German Research Centre for Geosciences (GFZ), Potsdam, Germany

<sup>6</sup> National Disaster Reduction Centre of China, Ministry of Emergency Management, Beijing, China

15 <sup>7</sup> DTU Space, Technical University of Denmark, 2800 Kongens Lyngby, Denmark

*Correspondence to:* Paul A. Carling: [p.a.carling@soton.ac.uk](mailto:p.a.carling@soton.ac.uk) and Peng Cui: [pengcui@imde.ac.cn](mailto:pengcui@imde.ac.cn)

### Contents of this file

20 **Figure S1**

**Tables S1 to S2**

25

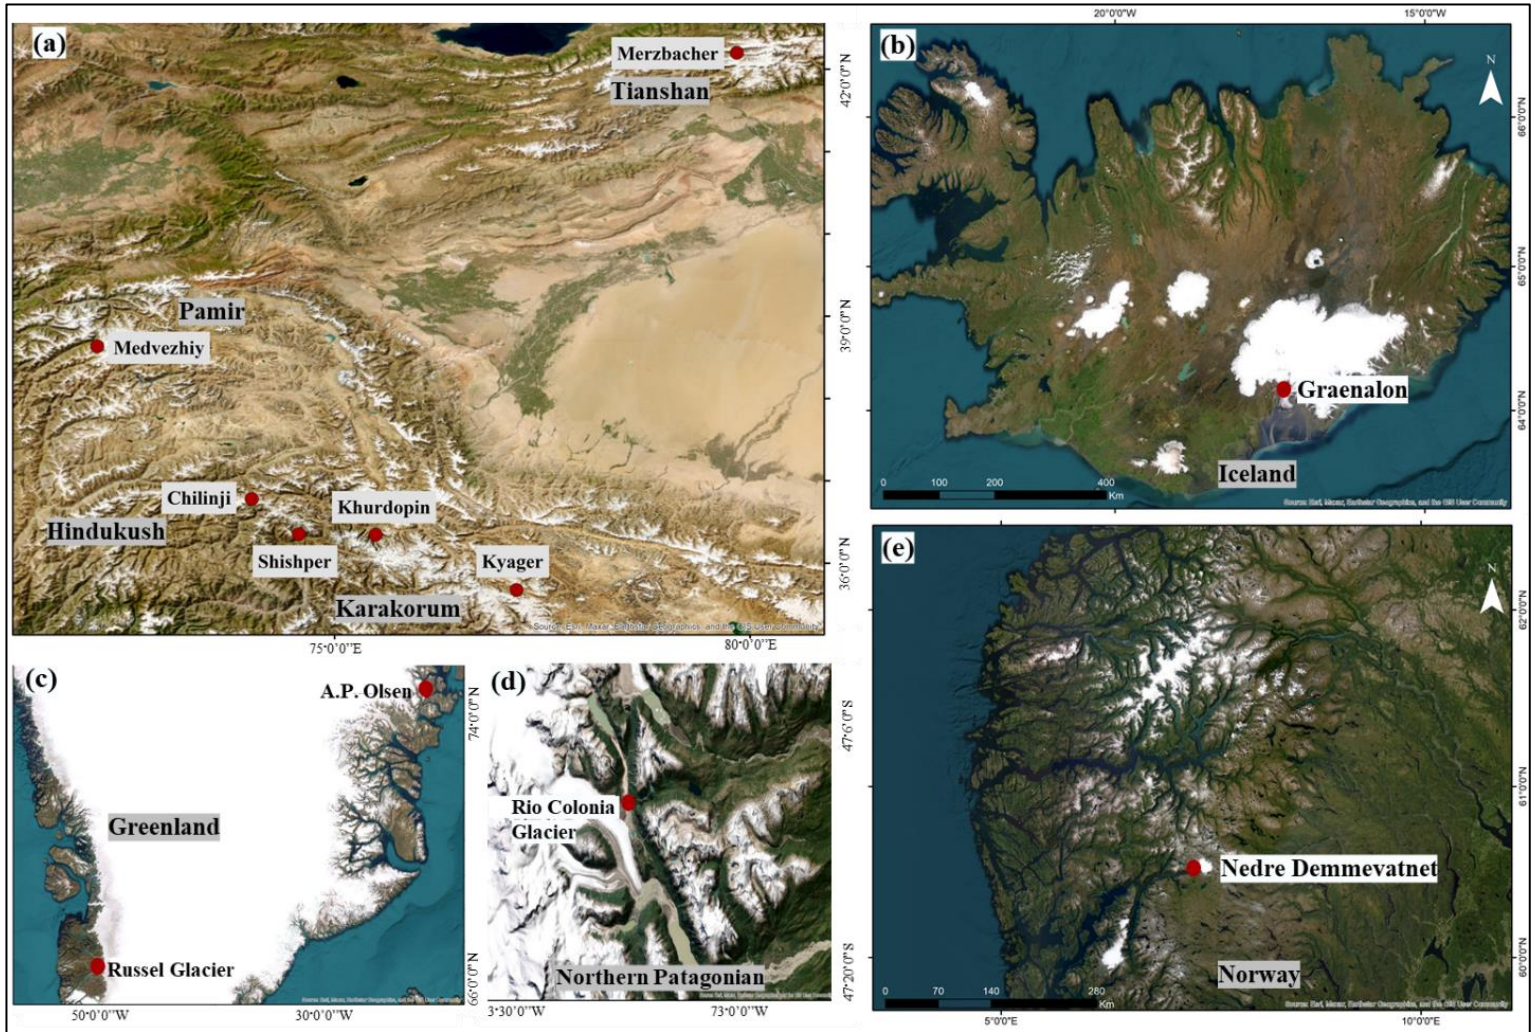

30 **Fig. S1:** The locations of mountain ranges and ice-dammed lakes around the world. The images used here are sourced from © Google Earth.

35 **Table S1.** Sources for the remote sensing data and spatial resolution employed in the present study for capturing the Glacial lakes and surge movements of glaciers from 1970 to 2022

| Satellite             | Sensor                      | Total used Scene | Launch Year      | No. of MS bands (Nominal resolution) | Panchromatic resolution (nominal) (m) | Thermal band resolution |
|-----------------------|-----------------------------|------------------|------------------|--------------------------------------|---------------------------------------|-------------------------|
| Landsat 1             | MSS                         | 17               | 1972             | 80 m (band 4)                        | -                                     | -                       |
| Landsat 2             | MSS                         | 66               | 1975             | 80 m (band 4)                        | -                                     | -                       |
| Landsat 3             | MSS                         | 17               | 1978             | 80 m (band 4)                        | -                                     | -                       |
| Landsat 4             | MSS                         | 152              | 1982             | 30 m (band 6)                        | -                                     | 120 m (1)               |
| Landsat 5             | MSS                         |                  | 1984             |                                      | -                                     |                         |
| Landsat 7             | ETM+                        | 106              | 1999             | 30 m (band 6)                        | 15m                                   | 60 m (1)                |
| Landsat 8 and 9       | ETM+                        | 232              | 2013             | 30 m (band 8)                        | 15m                                   | 100 m (2)               |
| Sentinel-2            | Multispectral Instrument    | 45               | 2015             | 60 m (Band 1, 9, 10)                 | 10 m (Band 2, 3, 4, 8)                | -                       |
| ASTER                 | state-of-the-art instrument | 55               | 1999             | 30 m (Band 4-9)                      | 15 m (Band 1-3b)                      | 90 m (Band 10-14)       |
| Gaofen-1 (GF-1)       |                             | 12               | 2013             | 8 m                                  | 2 m                                   | -                       |
| Gaofen-2 (GF-2)       | RTD                         | 23               | 2014             | 3.2 m                                | 0.8 m                                 | -                       |
| SPOT 6 and 7          | NAOMI                       | 11               | 2012<br>2014     | 1.5 m                                | 1.5 m                                 | -                       |
| Global Planet imagery | EO                          | 5                | 2013 and<br>2014 | -                                    | 3 m                                   | -                       |

45

**Table S2.** Sources of the list of Digital elevation models used in this study

| S.No. | Satellite/Sensor | Resolution (m) | Resample | Glacier Sites          | Source                                                                                        |
|-------|------------------|----------------|----------|------------------------|-----------------------------------------------------------------------------------------------|
| 1     | UAV              | 0.6311         | -        | Shishper and Khurdopin | Generated from the field data                                                                 |
| 2     | SRTM             | 90             | 30       |                        | <a href="https://lta.cr.usgs.gov/SRTM1Arc">https://lta.cr.usgs.gov/SRTM1Arc</a>               |
| 3     | ASTER            | 30             | 30       |                        | <a href="https://asterweb.jpl.nasa.gov/gdem.asp">https://asterweb.jpl.nasa.gov/gdem.asp</a>   |
| 4     | PALSAR-DEM       | 30             | 30       |                        | <a href="http://www.eorc.jaxa.jp/ALOS/en/aw3d30/">http://www.eorc.jaxa.jp/ALOS/en/aw3d30/</a> |
| 5     | KH-9             | 0.61           |          |                        | <a href="http://earthexplorer.usgs.gov/">http://earthexplorer.usgs.gov/</a>                   |

50

55

60
